# Supplementary material for: Not All Conservatives Are Vaccine Hesitant: Examining the Influence of Misinformation Exposure, Political Ideology, and Flu Vaccine Acceptance on COVID-19 Vaccine Hesitancy
Source: MDPI journal article supplement (doi:10.3390/vaccines11030586), 2023-03-03
Supplement: s1 [file s1]

## Supplementary Materials

Table S1. Predicting COVID-19 vaccine hesitancy

| Variable                          | COVID-19 Vaccine Hesitancy |            |
|-----------------------------------|----------------------------|------------|
|                                   | $\beta$                    | Std. Error |
| Protestant                        | -0.081***                  | 0.024      |
| Unaffiliated                      | -0.048***                  | 0.023      |
| Others                            | -0.057***                  | 0.033      |
| 30-49 Years Old                   | -0.001                     | 0.026      |
| 50-64 Years Old                   | -0.074***                  | 0.028      |
| 65+ Years Old                     | -0.139***                  | 0.031      |
| Education                         | -0.010                     | 0.006      |
| Income                            | -0.033***                  | 0.003      |
| Female                            | 0.158***                   | 0.018      |
| Others                            | 0.008                      | 0.090      |
| Marital Status                    | 0.035***                   | 0.020      |
| Black                             | 0.090***                   | 0.029      |
| Asian                             | -0.054***                  | 0.040      |
| Mixed Race                        | 0.012                      | 0.045      |
| Other Race                        | -0.025**                   | 0.042      |
| Political Ideology                | 0.152***                   | 0.008      |
| Flu Vaccine Acceptance            | -0.349***                  | 0.004      |
| Perceived Misinformation Exposure | 0.019*                     | 0.011      |
| <b>Total R<sup>2</sup></b>        | <b>0.252</b>               |            |

<sup>a</sup>Statistical significance is marked as \* $p < 0.05$ ; \*\* $p < 0.01$ ;  $p < 0.001$ \*\*\*.

<sup>b</sup>Political ideology is treated as a condensed variable here (1-3; liberal, moderate, and conservatives)
